# Supplementary material for: Protein Secondary Structure Affects Glycan Clustering in Native Mass Spectrometry
Source: MDPI journal article supplement (doi:10.3390/life11060554), 2021-06-11
Supplement: s1 [file s1]

**MNV-1 CW1: MS1 raw spectra (10 eV)**

**A) P monomer and dimer, B) + 250  $\mu$ M blood group B type-1 tetrasaccharide (HBGA)**

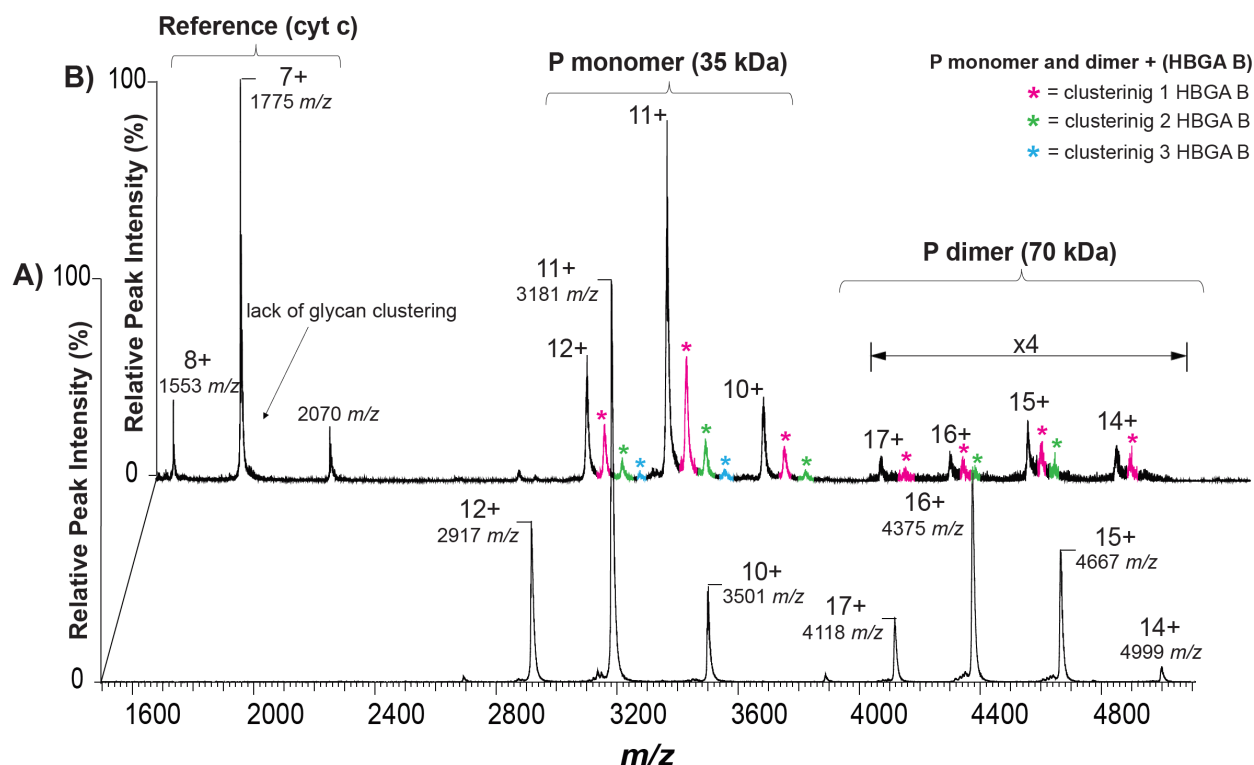

**Figure S1 glycan clustering on murine norovirus MNV-1 (CW1) P domain.** **A)** Native mass spectra of the P monomer and P dimer are shown, with a monomeric charge state distribution from 12+ to 10+ and a mass of 35 kDa and a dimeric charge state distribution of 17+ to 14+ with a mass of 70 kDa. **B)** Native mass spectra of cytochrome c (cyt c, 11  $\mu$ M) with the P monomer (4  $\mu$ M) and dimer (four times magnification) in presence of HBGA B clustering. HBGA B ligand concentration (250  $\mu$ M) in 250 mM ammonium acetate solution at pH 7.0).

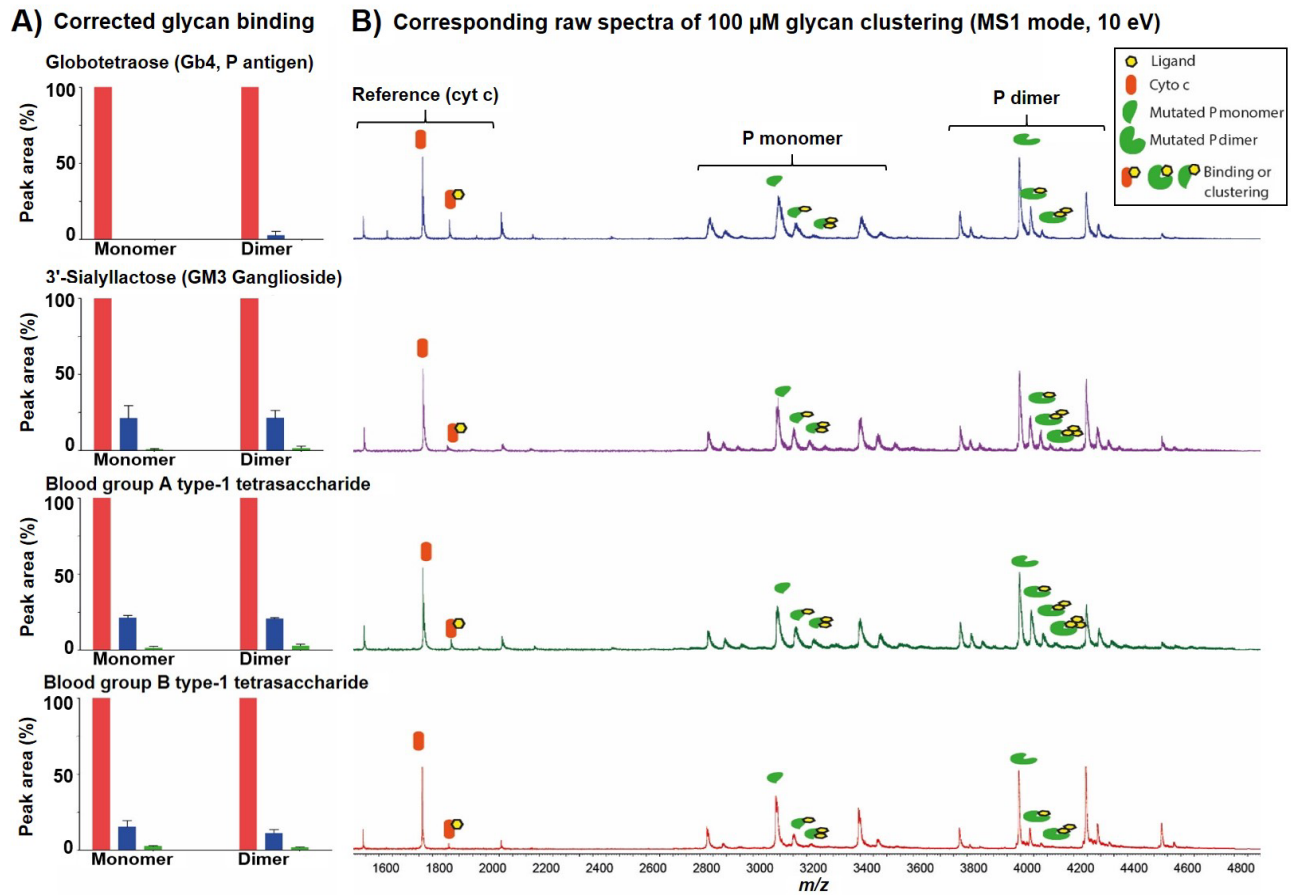

**Figure S2 glycan clustering on mutated hNoV GII.4 MI001 strain P domain.** **A)** The corrected binding of Gb4, GM3, blood group A and B type-1 tetrasaccharides (HBGA A, HBGA B) to mutated hNoV MI001 P dimer is shown, respectively in 100 $\mu$ M glycan concentration. **B)** Native mass spectra of cytochrome c (cyt c) with mutated hNoV MI001 P dimer in presence of different ligand Gb4 (dark blue), GM3 (purple), HBGA A (green), HBGA B (red) clustering (150 mM ammonium acetate solution at pH7). Signal intensity was normalized to the base peak in the spectra.

# Blood group B type-1 tetrasaccharide 300 $\mu$ M

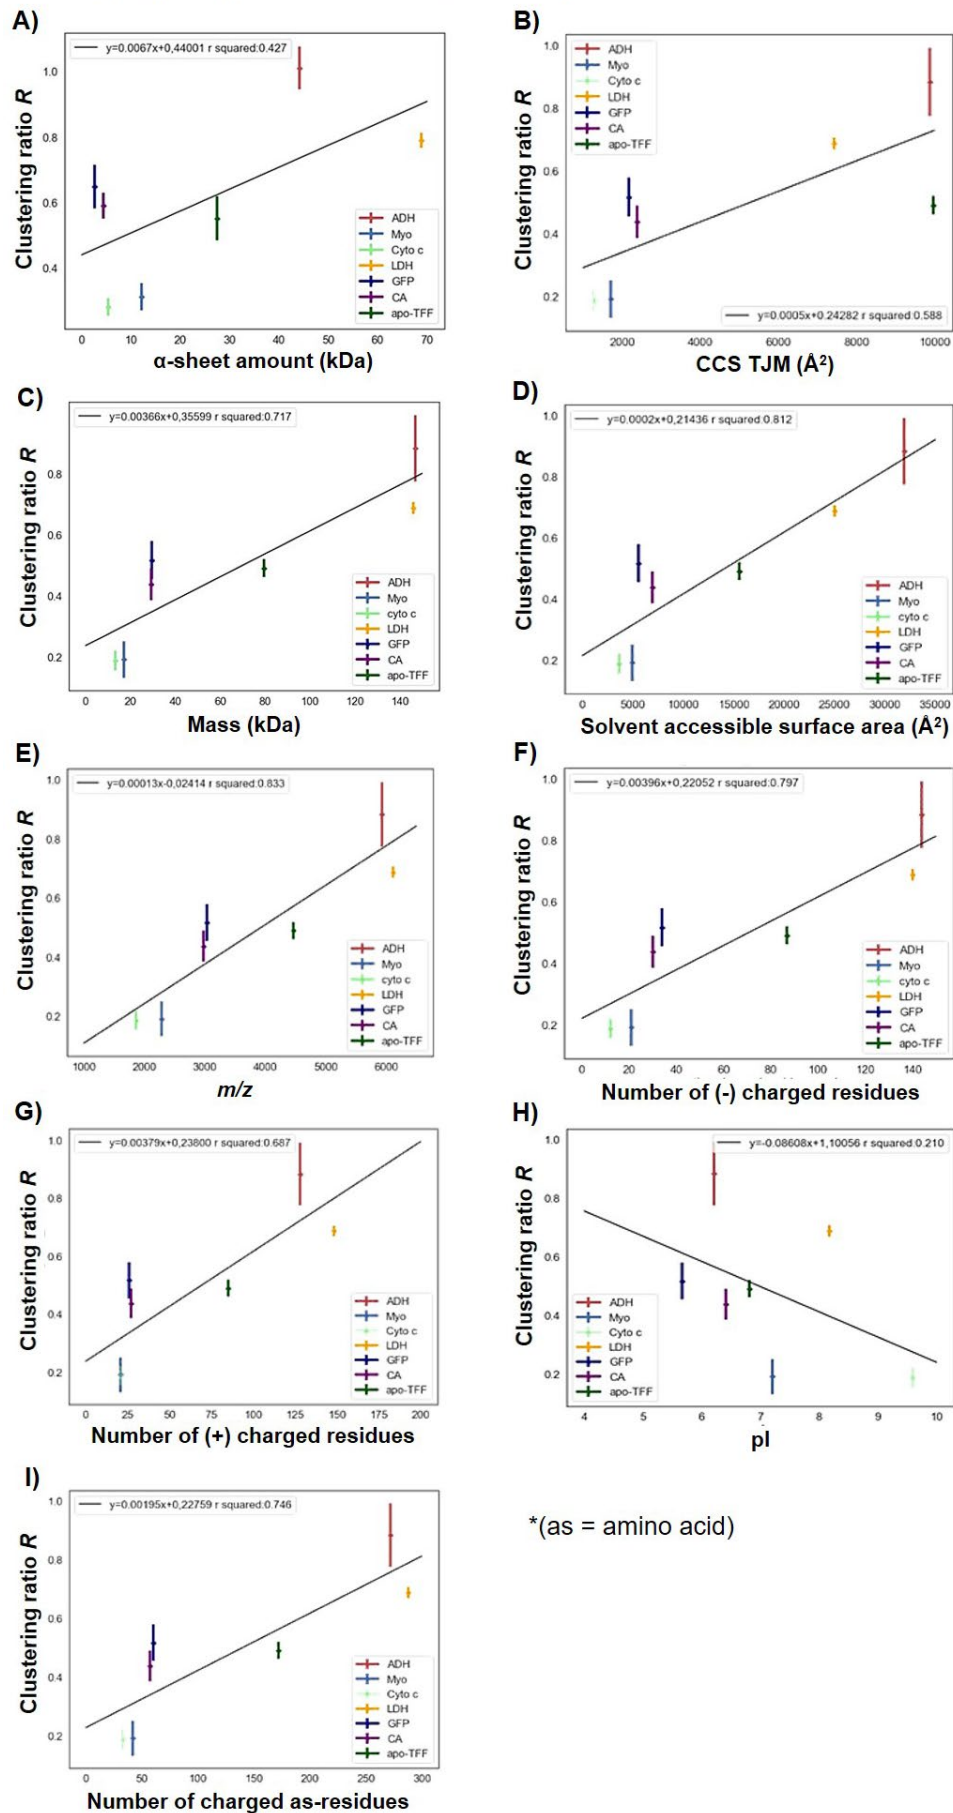

\*(as = amino acid)

**Figure S3. Correlation of clustering ratios to multiple protein property parameters.** The correlation of different physiochemical parameters of protein (**A**) absolute share of  $\alpha$ -helix in a protein, **B**) CCS TJM, **C**) protein mass (kDa), **D**) solvent accessible area, **E**) mass to charge ratio ( $m/z$ ), **F**) number of negative charged residues, **G**) number of positive charged residues, **H**) pI, **I**) number of charged residues) to unspecific glycan clustering ratios  $R$  of seven reference proteins (ADH, CAII, cyt c, GFP, Myo. LDH, apo-TFF) at a blood group B type-1 tetrasaccharide (HBGA B) concentration of 300  $\mu$ M was analysed. Native MS experiments were performed with a fixed concentration of P dimer (1  $\mu$ M) and reference proteins (3  $\mu$ M) at 150 mM ammonium acetate, pH 7. The reference protein structures and protein sequence information is derived from corresponding PDB files (see Table 1). The black line represents the linear regression.

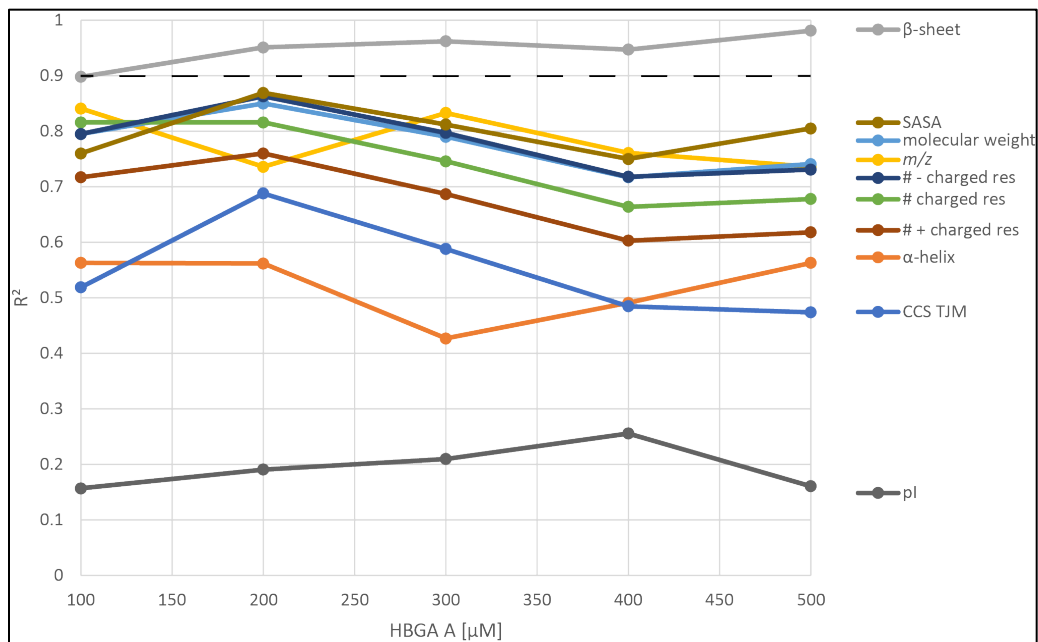

**Figure S4. Correlation plotted as  $R^2$  of clustering ratios  $R$  to different protein properties over employed HBGA A concentration.**  $R^2$  of the different parameters ( $\beta$ -sheet amount in kDa, of  $\alpha$ -helix amount in kDa, charged residues, molecular weight of the protein,  $m/z$ ) obtained for correlations at indicated HBGA A concentrations for the seven reference proteins. This is an alternative representation of the data displayed in Fig. 4A.

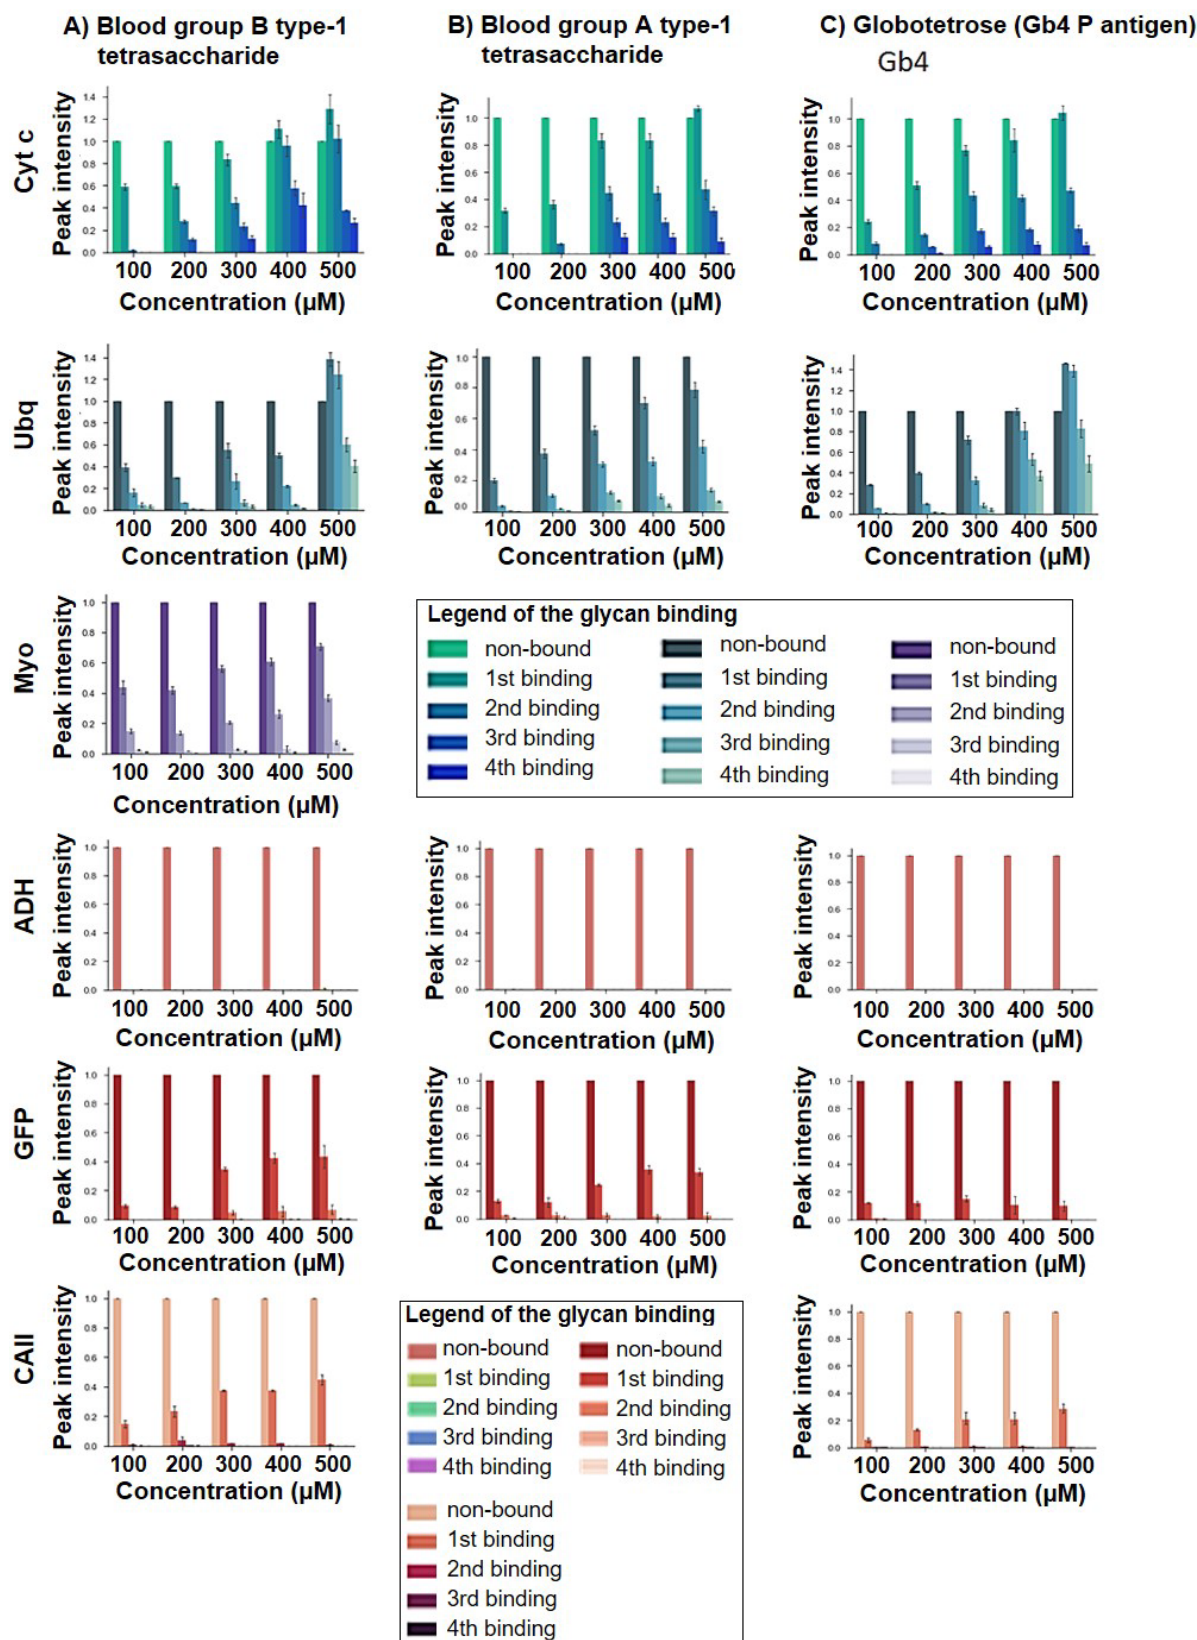

Figure S5. Specific binding of different carbohydrates on the P dimer after correction of the unspecific glycan clustering. Correction is based on the different reference proteins (glycans: blood group A and B

type-1 tetrasaccharide (HBGA), Globotetrose (Gb4, P antigen) at 100 - 500  $\mu\text{M}$  concentration; ref. proteins: cyt c, Ubq, Myo, ADH, GFP, CAII).

**A) 400  $\mu\text{M}$  blood group B type-1 tetrasaccharide**

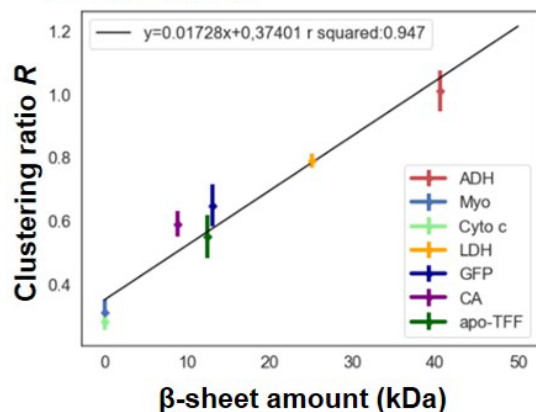

**B) 300  $\mu\text{M}$  blood group B type-1 tetrasaccharide**

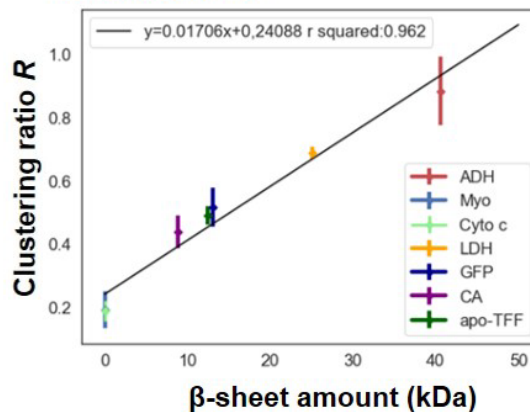

**C) 200  $\mu\text{M}$  blood group B type-1 tetrasaccharide**

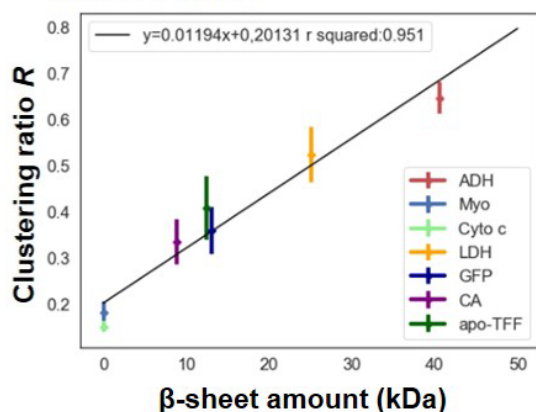

**D) 100  $\mu\text{M}$  blood group B type-1 tetrasaccharide**

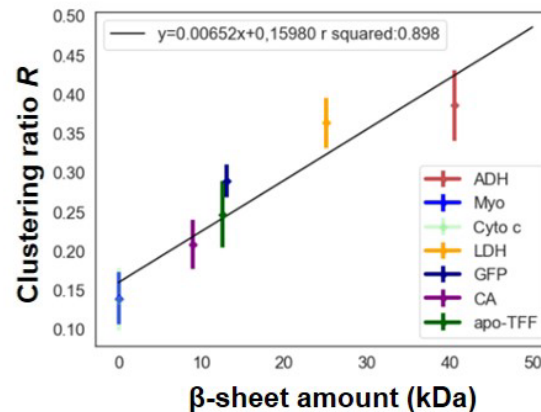

**Figure S6.** The relation between the amount of beta-sheet in the reference protein and the unspecific glycan clustering ratio  $R$  at different ligand concentrations (400  $\mu\text{M}$  (A), 300  $\mu\text{M}$  (B), 200  $\mu\text{M}$  (C) and 100  $\mu\text{M}$  (D)). The  $R$  value is calculated from the peak-area of the reference proteins (ADH, CA, cyto c, GFP, Myo, Ubq, LDH, apo-TFF). Native MS experiment were performed with a fixed concentration of P dimer (1  $\mu\text{M}$ ) and reference proteins (3  $\mu\text{M}$ ) at 150 mM ammonium acetate, pH7. The black line represents the linear regression between the unspecific clustering ratio of each reference protein and the corresponding mass of beta-sheets. The reference protein structures and protein sequence information is derived from each of corresponding defined PDB file.

Table S1. Glycan clustering ratio of HBGA B interaction with P dimer analysed with native MS. Data correction is based on the reference protein method.

| Ref . Protein | glycan clustering ratio |           |           |           |           |           |           |           |           |           |           |           |           |           |           |
|---------------|-------------------------|-----------|-----------|-----------|-----------|-----------|-----------|-----------|-----------|-----------|-----------|-----------|-----------|-----------|-----------|
|               | 100 µM                  |           |           | 200 µM    |           |           | 300 µM    |           |           | 400 µM    |           |           | 500 µM    |           |           |
|               | HBGA B                  | Gb4       | HBGA A    | HBGA B    | Gb4       | HBGA A    | HBGA B    | Gb4       | HBGA A    | HBGA B    | Gb4       | HBGA A    | HBGA B    | Gb4       | HBGA A    |
| Myo           | 0.14±0.03               | 0.14±0.02 | 0.13±0.03 | 0.18±0.02 | 0.17±0.03 | 0.16±0.03 | 0.19±0.06 | 0.20±0.03 | 0.22±0.03 | 0.31±0.04 | 0.30±0.01 | 0.29±0.04 | 0.36±0.05 | 0.37±0.06 | 0.34±0.03 |
| Cyt c         | 0.14±0.01               | 0.10±0.01 | 0.18±0.03 | 0.15±0.01 | 0.15±0.00 | 0.16±0.02 | 0.19±0.03 | 0.19±0.03 | 0.19±0.03 | 0.29±0.02 | 0.29±0.04 | 0.27±0.02 | 0.35±0.03 | 0.45±0.02 | 0.41±0.09 |
| Ubq           | 0.04±0.01               | 0.03±0.01 | 0.06±0.03 | 0.04±0.01 | 0.04±0.01 | 0.04±0.01 | 0.10±0.03 | 0.12±0.02 | 0.13±0.01 | 0.18±0.01 | 0.21±0.20 | 0.18±0.01 | 0.25±0.00 | 0.09±0.03 | 0.10±0.05 |
| GFP           | 0.30±0.02               | 0.27±0.02 | 0.30±0.02 | 0.41±0.02 | 0.32±0.07 | 0.35±0.05 | 0.44±0.04 | 0.53±0.01 | 0.54±0.01 | 0.57±0.01 | 0.69±0.04 | 0.68±0.04 | 0.67±0.02 | 0.80±0.03 | 0.86±0.04 |
| CA            | 0.22±0.03               | 0.21±0.01 | 0.20±0.05 | 0.32±0.05 | 0.32±0.07 | 0.37±0.01 | 0.40±0.04 | 0.50±0.00 | 0.42±0.02 | 0.60±0.05 | 0.60±0.05 | 0.57±0.02 | 0.75±0.07 | 0.75±0.03 | 0.74±0.07 |
| ADH           | 0.42±0.03               | 0.34±0.04 | 0.39±0.02 | 0.64±0.06 | 0.66±0.03 | 0.65±0.02 | 0.97±0.08 | 0.81±0.11 | 0.88±0.10 | 1.02±0.08 | 1.03±0.08 | 0.98±0.05 | 1.45±0.11 | 1.26±0.03 | 1.32±0.10 |
| apo-TFF       | 0.37±0.03               | 0.36±0.05 | 0.39±0.02 | 0.56±0.05 | 0.57±0.06 | 0.57±0.05 | 0.62±0.03 | 0.63±0.02 | 0.65±0.02 | 0.74±0.01 | 0.69±0.02 | 0.71±0.03 | 0.82±0.03 | 0.80±0.05 | 0.79±0.03 |
| LDH           | 0.38±0.03               | 0.35±0.04 | n.a.      | 0.54±0.05 | 0.51±0.08 | n.a.      | 0.69±0.02 | 0.68±0.02 | n.a.      | 0.77±0.05 | 0.80±0.01 | n.a.      | 1.02±0.04 | 0.91±0.06 | n.a.      |
| SAGA P dimer  | 0.44±0.07               | 0.35±0.06 | 0.37±0.13 | 0.62±0.05 | 0.60±0.09 | 0.66±0.10 | 1.01±0.02 | 1.05±0.09 | 0.98±0.08 | 1.31±0.20 | 1.21±0.15 | 1.34±0.26 | 1.55±0.05 | 1.40±0.21 | 1.44±0.15 |

Table S2. Bound number of carbohydrates on P dimer analysed with native MS. Data correction is based on the reference protein method.

| Ref. Protein | Bound number of HBGA B on Saga P dimer |     |     |     |     | Bound number of HBGA A on Saga P dimer |     |     |     |     | Bound number of Gb4 on Saga P dimer |     |     |     |     |
|--------------|----------------------------------------|-----|-----|-----|-----|----------------------------------------|-----|-----|-----|-----|-------------------------------------|-----|-----|-----|-----|
|              | 100                                    | 200 | 300 | 400 | 500 | 100                                    | 200 | 300 | 400 | 500 | 100                                 | 200 | 300 | 400 | 500 |
| Myo          | 2                                      | 3   | 3   | 3   | 4   | 2                                      | 3   | 3   | 3   | 4   | 2                                   | 3   | 3   | 3   | 4   |
| Cyto c       | 2                                      | 3   | 4   | 4   | 4   | 2                                      | 3   | 3   | 4   | 4   | 1                                   | 2   | 3   | 3   | 4   |
| Ubq          | 2                                      | 3   | 4   | 4   | 4   | 2                                      | 3   | 4   | 4   | 4   | 2                                   | 3   | 4   | 4   | 4   |
| GFP          | 1                                      | 1   | 2   | 2   | 2   | 1                                      | 1   | 1   | 1   | 1   | 2                                   | 2   | 2   | 2   | 2   |
| CA           | 1                                      | 2   | 2   | 2   | 2   | 1                                      | 1   | 1   | 1   | 1   | 1                                   | 1   | 2   | 2   | 2   |
| ADH          | 0                                      | 0   | 0   | 0   | 1   | 0                                      | 0   | 0   | 0   | 0   | 0                                   | 0   | 0   | 0   | 0   |
| apo-TFF      | 1                                      | 1   | 1   | 1   | 2   | 0                                      | 0   | 1   | 1   | 1   | 0                                   | 0   | 1   | 1   | 1   |
| LDH          | 0                                      | 0   | 0   | 0   | 1   | 0                                      | 0   | 0   | 0   | 1   | 0                                   | 0   | 0   | 0   | 1   |

Table S3. Protein physiochemical properties used for plots. Data is obtained from Protein Data Bank in Europe (<https://www.ebi.ac.uk/pdbe-srv/pdbechem/>)

| Ref. Protein | Analysed protein physiochemical feature |                      |        |         |                                 |                                 |      |                        |                         |      |
|--------------|-----------------------------------------|----------------------|--------|---------|---------------------------------|---------------------------------|------|------------------------|-------------------------|------|
|              | The share of β-sheet                    | The share of α-helix | mass   | CCS TJM | positive charge residues number | negative charge residues number | pI   | charge residues number | solvent accessible area | m/z  |
| ADH          | 40.60                                   | 44.21                | 147.00 | 9876.81 | 128.00                          | 144                             | 6.21 | 272.00                 | 31928.42                | 5933 |
| apo-TFF      | 12.51                                   | 27.46                | 79.60  | 9959.74 | 85.00                           | 87                              | 6.81 | 172.00                 | 15595.88                | 4469 |
| CA           | 8.91                                    | 4.40                 | 29.10  | 2378.38 | 27.00                           | 30                              | 6.41 | 57.00                  | 6984.81                 | 2985 |
| cyto c       | 0.00                                    | 5.44                 | 13.20  | 1286.00 | 21.00                           | 12                              | 9.59 | 33.00                  | 3618.71                 | 1864 |
| GFP          | 13.08                                   | 2.61                 | 29.60  | 2164.24 | 26.00                           | 34                              | 5.67 | 60.00                  | 5608.96                 | 3037 |
| LDH          | 25.07                                   | 68.81                | 146.10 | 7421.70 | 148.00                          | 140                             | 8.17 | 288.00                 | 25045.90                | 6120 |
| Myo          | 0.00                                    | 12.14                | 17.00  | 1714.99 | 21.00                           | 21                              | 7.20 | 42.00                  | 4980.50                 | 2283 |
